# Supplementary material for: Review of ten-years presence of Aedes albopictus in Spain 2004–2014: known distribution and public health concerns
Source: PubMed Central journal article supplement (PMC4688962; doi:10.1186/s13071-015-1262-y), 2015-12-23
Supplement: 13071_2015_1262_MOESM1_ESM.pdf [file 13071_2015_1262_MOESM1_ESM.pdf]

## Appendix

Historical record of the first detections of *Aedes albopictus* in municipalities of Spain. The bibliographical reference is included or it is considered as new record if this information was still unpublished. The reference number is related to the list of references of main document.

| Record year | Municipality              | Province/Island | Region              | Reference |
|-------------|---------------------------|-----------------|---------------------|-----------|
| 2004        | Cerdanyola del Vallès     | Barcelona       | Catalonia           | [9]       |
| 2004        | Sant Cugat del Vallès     | Barcelona       | Catalonia           | [3]       |
| 2005        | Barberà del Vallès        | Barcelona       | Catalonia           | [11]      |
| 2005        | Barcelona                 | Barcelona       | Catalonia           | [11]      |
| 2005        | El Papiol                 | Barcelona       | Catalonia           | [11]      |
| 2005        | Molins de Rei             | Barcelona       | Catalonia           | [9]       |
| 2005        | Ripollet                  | Barcelona       | Catalonia           | [9]       |
| 2005        | Rubí                      | Barcelona       | Catalonia           | [9]       |
| 2005        | Sant Quirze del Vallès    | Barcelona       | Catalonia           | [9]       |
| 2005        | Terrassa                  | Barcelona       | Catalonia           | [9]       |
| 2005        | Altafulla                 | Tarragona       | Catalonia           | [11]      |
| 2005        | Orihuela                  | Alicante        | Valencian Community | [11]      |
| 2006        | Badia del Vallés          | Barcelona       | Catalonia           | [9]       |
| 2006        | Caldes d'Estrac           | Barcelona       | Catalonia           | [9]       |
| 2006        | Castellbisbal             | Barcelona       | Catalonia           | [9]       |
| 2006        | Castelldefels             | Barcelona       | Catalonia           | [11]      |
| 2006        | Esplugues de Llobregat    | Barcelona       | Catalonia           | [11]      |
| 2006        | Gavà                      | Barcelona       | Catalonia           | [11]      |
| 2006        | L'Hospitalet de Llobregat | Barcelona       | Catalonia           | [11]      |
| 2006        | Montcada i Reixac         | Barcelona       | Catalonia           | [9]       |
| 2006        | Pallejà                   | Barcelona       | Catalonia           | [11]      |
| 2006        | Polinyà                   | Barcelona       | Catalonia           | [9]       |
| 2006        | Sabadell                  | Barcelona       | Catalonia           | [9]       |
| 2006        | Sant Feliu de Llobregat   | Barcelona       | Catalonia           | [11]      |
| 2006        | Sant Just Desvern         | Barcelona       | Catalonia           | [11]      |
| 2006        | Santa Perpètua de Mogoda  | Barcelona       | Catalonia           | [10]      |
| 2006        | Sitges                    | Barcelona       | Catalonia           | [11]      |
| 2006        | Vallirana                 | Barcelona       | Catalonia           | [11]      |
| 2006        | Vilanova i la Geltrú      | Barcelona       | Catalonia           | [11]      |
| 2007        | Abrera                    | Barcelona       | Catalonia           | [10]      |
| 2007        | Arenys de Mar             | Barcelona       | Catalonia           | [10]      |
| 2007        | Badalona                  | Barcelona       | Catalonia           | [10]      |
| 2007        | Canet de Mar              | Barcelona       | Catalonia           | [10]      |
| 2007        | Castellar del Vallès      | Barcelona       | Catalonia           | [10]      |
| 2007        | Castellví de Rosanes      | Barcelona       | Catalonia           | [10]      |
| 2007        | Cervelló                  | Barcelona       | Catalonia           | [10]      |
| 2007        | Cornellà de Llobregat     | Barcelona       | Catalonia           | [10]      |
| 2007        | Cubelles                  | Barcelona       | Catalonia           | [10]      |
| 2007        | El Masnou                 | Barcelona       | Catalonia           | [10]      |
| 2007        | El Prat de Llobregat      | Barcelona       | Catalonia           | [10]      |
| 2007        | Esparreguera              | Barcelona       | Catalonia           | [10]      |
| 2007        | Gelida                    | Barcelona       | Catalonia           | [10]      |

|      |                            |           |           |      |
|------|----------------------------|-----------|-----------|------|
| 2007 | La Palma de Cervelló       | Barcelona | Catalonia | [10] |
| 2007 | Martorell                  | Barcelona | Catalonia | [10] |
| 2007 | Mollet del Vallès          | Barcelona | Catalonia | [10] |
| 2007 | Montgat                    | Barcelona | Catalonia | [10] |
| 2007 | Palau-solità i Plegamans   | Barcelona | Catalonia | [10] |
| 2007 | Sant Adrià de Besos        | Barcelona | Catalonia | [10] |
| 2007 | Sant Andreu de la Barca    | Barcelona | Catalonia | [10] |
| 2007 | Sant Boi de Llobregat      | Barcelona | Catalonia | [10] |
| 2007 | Sant Fost de Campsentelles | Barcelona | Catalonia | [10] |
| 2007 | Sant Joan Despí            | Barcelona | Catalonia | [10] |
| 2007 | Santa Coloma de Cervelló   | Barcelona | Catalonia | [10] |
| 2007 | Santa Coloma de Gramenet   | Barcelona | Catalonia | [10] |
| 2007 | Ullastrell                 | Barcelona | Catalonia | [10] |
| 2007 | Viladecans                 | Barcelona | Catalonia | [10] |
| 2008 | Blanes                     | Girona    | Catalonia | [10] |
| 2008 | Lloret de Mar              | Girona    | Catalonia | [10] |
| 2008 | Maçanet de la Selva        | Girona    | Catalonia | [10] |
| 2008 | Tossa de Mar               | Girona    | Catalonia | [10] |
| 2008 | Vidreres                   | Girona    | Catalonia | [10] |
| 2008 | Argentona                  | Barcelona | Catalonia | [10] |
| 2008 | Begues                     | Barcelona | Catalonia | [10] |
| 2008 | Calella                    | Barcelona | Catalonia | [10] |
| 2008 | Canyelles                  | Barcelona | Catalonia | [10] |
| 2008 | Cardedeu                   | Barcelona | Catalonia | [10] |
| 2008 | Granollers                 | Barcelona | Catalonia | [10] |
| 2008 | Lliçà d'Amunt              | Barcelona | Catalonia | [10] |
| 2008 | Martorelles                | Barcelona | Catalonia | [10] |
| 2008 | Premià de Dalt             | Barcelona | Catalonia | [10] |
| 2008 | Premià de Mar              | Barcelona | Catalonia | [10] |
| 2008 | Sant Andreu de Llavaneres  | Barcelona | Catalonia | [10] |
| 2008 | Sant Cebrià de Vallalta    | Barcelona | Catalonia | [10] |
| 2008 | Sant Esteve Sesrovires     | Barcelona | Catalonia | [10] |
| 2008 | Sant Pere de Ribes         | Barcelona | Catalonia | [10] |
| 2008 | Sant Vicenç de Castellet   | Barcelona | Catalonia | [10] |
| 2008 | Sant Vicenç de Montalt     | Barcelona | Catalonia | [10] |
| 2008 | Sant Vicenç dels Horts     | Barcelona | Catalonia | [10] |
| 2008 | Teià                       | Barcelona | Catalonia | [10] |
| 2008 | Tiana                      | Barcelona | Catalonia | [10] |
| 2008 | Tordera                    | Barcelona | Catalonia | [10] |
| 2008 | Torrelles de Llobregat     | Barcelona | Catalonia | [10] |
| 2008 | Vacarisses                 | Barcelona | Catalonia | [10] |
| 2008 | Viladecavalls              | Barcelona | Catalonia | [10] |
| 2008 | Vilassar de Dalt           | Barcelona | Catalonia | [10] |
| 2008 | Maials                     | Lleida    | Catalonia | [10] |
| 2008 | Calafell                   | Tarragona | Catalonia | [10] |
| 2008 | El Vendrell                | Tarragona | Catalonia | [10] |
| 2008 | Tarragona                  | Tarragona | Catalonia | [10] |
| 2008 | Torredembarra              | Tarragona | Catalonia | [10] |

|      |                            |           |                     |                      |
|------|----------------------------|-----------|---------------------|----------------------|
| 2009 | Caldes de Malavella        | Girona    | Catalonia           | [13]                 |
| 2009 | Calonge                    | Girona    | Catalonia           | [13]                 |
| 2009 | Castell-Platja d'Aro       | Girona    | Catalonia           | [13]                 |
| 2009 | L'Escala                   | Girona    | Catalonia           | [13]                 |
| 2009 | Llagostera                 | Girona    | Catalonia           | [13]                 |
| 2009 | Riudarenes                 | Girona    | Catalonia           | [13]                 |
| 2009 | Sils                       | Girona    | Catalonia           | [13]                 |
| 2009 | Alella                     | Barcelona | Catalonia           | [13]                 |
| 2009 | Arenys de Munt             | Barcelona | Catalonia           | [13]                 |
| 2009 | Cabrera de Mar             | Barcelona | Catalonia           | [13]                 |
| 2009 | Caldes de Montbui          | Barcelona | Catalonia           | [13]                 |
| 2009 | Castellbell i el Vilar     | Barcelona | Catalonia           | [13]                 |
| 2009 | La Garriga                 | Barcelona | Catalonia           | [13]                 |
| 2009 | Lliçà de Vall              | Barcelona | Catalonia           | [13]                 |
| 2009 | Manresa                    | Barcelona | Catalonia           | [13]                 |
| 2009 | Masquefa                   | Barcelona | Catalonia           | [13]                 |
| 2009 | Matadepera                 | Barcelona | Catalonia           | [13]                 |
| 2009 | Mataró                     | Barcelona | Catalonia           | [13]                 |
| 2009 | Montmeló                   | Barcelona | Catalonia           | [13]                 |
| 2009 | Montornès del Vallès       | Barcelona | Catalonia           | [13]                 |
| 2009 | Olesa de Bonesvalls        | Barcelona | Catalonia           | [13]                 |
| 2009 | Parets del Vallès          | Barcelona | Catalonia           | [13]                 |
| 2009 | Piera                      | Barcelona | Catalonia           | [13]                 |
| 2009 | Rellinars                  | Barcelona | Catalonia           | [13]                 |
| 2009 | Sant Fruitós de Bages      | Barcelona | Catalonia           | [13]                 |
| 2009 | Sant Llorenç d'Hortons     | Barcelona | Catalonia           | [13]                 |
| 2009 | Sant Llorenç Savall        | Barcelona | Catalonia           | [13]                 |
| 2009 | Sant Sadurní d'Anoia       | Barcelona | Catalonia           | [13]                 |
| 2009 | Santa Eulàlia de Ronçana   | Barcelona | Catalonia           | [13]                 |
| 2009 | Santa Maria de Martorelles | Barcelona | Catalonia           | [13]                 |
| 2009 | Subirats                   | Barcelona | Catalonia           | [13]                 |
| 2009 | Vallromanes                | Barcelona | Catalonia           | [13]                 |
| 2009 | Vilafranca del Penedès     | Barcelona | Catalonia           | [13]                 |
| 2009 | Vilanova del Vallès        | Barcelona | Catalonia           | [13]                 |
| 2009 | Vilassar de Mar            | Barcelona | Catalonia           | [13]                 |
| 2009 | Creixell                   | Tarragona | Catalonia           | [13]                 |
| 2009 | Roda de Barà               | Tarragona | Catalonia           | [13]                 |
| 2009 | Torreveija                 | Alicante  | Valencian Community | Delacour et al. 2009 |
| 2010 | Girona                     | Girona    | Catalonia           | [13]                 |
| 2010 | Sant Andreu de Salou       | Girona    | Catalonia           | [13]                 |
| 2010 | Avinyonet del Penedès      | Barcelona | Catalonia           | [13]                 |
| 2010 | Bigues i Riells            | Barcelona | Catalonia           | [13]                 |
| 2010 | Cabrera d'Anoia            | Barcelona | Catalonia           | [13]                 |
| 2010 | Cabrils                    | Barcelona | Catalonia           | [13]                 |
| 2010 | Canovelles                 | Barcelona | Catalonia           | [13]                 |
| 2010 | Cànoves i Samalús          | Barcelona | Catalonia           | [13]                 |
| 2010 | Castellet i la Gornal      | Barcelona | Catalonia           | New record           |

|      |                                |           |                     |            |
|------|--------------------------------|-----------|---------------------|------------|
| 2010 | Castellgalí                    | Barcelona | Catalonia           | [13]       |
| 2010 | Castellolí                     | Barcelona | Catalonia           | [13]       |
| 2010 | Collbató                       | Barcelona | Catalonia           | New record |
| 2010 | Corbera de Llobregat           | Barcelona | Catalonia           | New record |
| 2010 | Dosrius                        | Barcelona | Catalonia           | [13]       |
| 2010 | El Bruc                        | Barcelona | Catalonia           | [13]       |
| 2010 | El Pont de Vilomara i Rocafort | Barcelona | Catalonia           | [13]       |
| 2010 | Els Hostalets de Pierola       | Barcelona | Catalonia           | [13]       |
| 2010 | Gallifa                        | Barcelona | Catalonia           | [13]       |
| 2010 | L'Ametlla del Vallès           | Barcelona | Catalonia           | [13]       |
| 2010 | La Llagosta                    | Barcelona | Catalonia           | [13]       |
| 2010 | Les Franqueses del Vallès      | Barcelona | Catalonia           | [13]       |
| 2010 | Malgrat de Mar                 | Barcelona | Catalonia           | [13]       |
| 2010 | Marganell                      | Barcelona | Catalonia           | [13]       |
| 2010 | Monistrol de Montserrat        | Barcelona | Catalonia           | [13]       |
| 2010 | Olesa de Montserrat            | Barcelona | Catalonia           | New record |
| 2010 | Olivella                       | Barcelona | Catalonia           | [13]       |
| 2010 | Òrrius                         | Barcelona | Catalonia           | [13]       |
| 2010 | Palafolls                      | Barcelona | Catalonia           | [13]       |
| 2010 | Pineda de Mar                  | Barcelona | Catalonia           | [13]       |
| 2010 | Sant Celoni                    | Barcelona | Catalonia           | [13]       |
| 2010 | Sant Climent de Llobregat      | Barcelona | Catalonia           | New record |
| 2010 | Sant Cugat Sesgarrigues        | Barcelona | Catalonia           | [13]       |
| 2010 | Sant Feliu de Codines          | Barcelona | Catalonia           | [13]       |
| 2010 | Sant Iscle de Vallalta         | Barcelona | Catalonia           | [13]       |
| 2010 | Sant Pol de Mar                | Barcelona | Catalonia           | [13]       |
| 2010 | Santa Susanna                  | Barcelona | Catalonia           | [13]       |
| 2010 | Sentmenat                      | Barcelona | Catalonia           | [13]       |
| 2010 | Torrelavit                     | Barcelona | Catalonia           | [13]       |
| 2010 | Vallbona d'Anoia               | Barcelona | Catalonia           | [13]       |
| 2010 | Bellvei                        | Tarragona | Catalonia           | [13]       |
| 2010 | Cambrils                       | Tarragona | Catalonia           | [13]       |
| 2010 | Castellvell del Camp           | Tarragona | Catalonia           | [13]       |
| 2010 | Cunit                          | Tarragona | Catalonia           | [13]       |
| 2010 | El Catllar                     | Tarragona | Catalonia           | [13]       |
| 2010 | Els Pallaresos                 | Tarragona | Catalonia           | [13]       |
| 2010 | La Pobla de Montornès          | Tarragona | Catalonia           | [13]       |
| 2010 | La Riera de Gaià               | Tarragona | Catalonia           | [13]       |
| 2010 | Reus                           | Tarragona | Catalonia           | [13]       |
| 2010 | Salou                          | Tarragona | Catalonia           | [13]       |
| 2010 | Vila-seca                      | Tarragona | Catalonia           | [13]       |
| 2010 | Benicàssim                     | Castellón | Valencian Community | [24]       |
| 2011 | Aiguaviva                      | Girona    | Catalonia           | New record |
| 2011 | Banyoles                       | Girona    | Catalonia           | New record |
| 2011 | Begur                          | Girona    | Catalonia           | New record |
| 2011 | Cassà de la Selva              | Girona    | Catalonia           | New record |
| 2011 | Castelló d'Empúries            | Girona    | Catalonia           | New record |
| 2011 | Celrà                          | Girona    | Catalonia           | New record |

|      |                              |           |           |            |
|------|------------------------------|-----------|-----------|------------|
| 2011 | Figueres                     | Girona    | Catalonia | New record |
| 2011 | Fornells de la Selva         | Girona    | Catalonia | New record |
| 2011 | Hostalric                    | Girona    | Catalonia | New record |
| 2011 | La Jonquera                  | Girona    | Catalonia | New record |
| 2011 | Palafrugell                  | Girona    | Catalonia | New record |
| 2011 | Palamós                      | Girona    | Catalonia | New record |
| 2011 | Pals                         | Girona    | Catalonia | New record |
| 2011 | Riells i Viabrea             | Girona    | Catalonia | New record |
| 2011 | Riudellots de la Selva       | Girona    | Catalonia | New record |
| 2011 | Roses                        | Girona    | Catalonia | New record |
| 2011 | Salt                         | Girona    | Catalonia | New record |
| 2011 | Sant Feliu de Buixalleu      | Girona    | Catalonia | New record |
| 2011 | Sant Feliu de Guíxols        | Girona    | Catalonia | New record |
| 2011 | Sant Gregori                 | Girona    | Catalonia | New record |
| 2011 | Sant Julià de Ramis          | Girona    | Catalonia | New record |
| 2011 | Santa Coloma de Farners      | Girona    | Catalonia | New record |
| 2011 | Santa Cristina d'Aro         | Girona    | Catalonia | New record |
| 2011 | Sarrià de Ter                | Girona    | Catalonia | New record |
| 2011 | Torroella de Montgrí         | Girona    | Catalonia | New record |
| 2011 | Vilablareix                  | Girona    | Catalonia | New record |
| 2011 | Vilamalla                    | Girona    | Catalonia | New record |
| 2011 | Vilobí d'Onyar               | Girona    | Catalonia | New record |
| 2011 | Aiguafreda                   | Barcelona | Catalonia | New record |
| 2011 | Artés                        | Barcelona | Catalonia | New record |
| 2011 | Capellades                   | Barcelona | Catalonia | New record |
| 2011 | Castellnou de Bages          | Barcelona | Catalonia | New record |
| 2011 | Centelles                    | Barcelona | Catalonia | New record |
| 2011 | Fogars de la Selva           | Barcelona | Catalonia | New record |
| 2011 | Fogars de Montclús           | Barcelona | Catalonia | New record |
| 2011 | Fonollosa                    | Barcelona | Catalonia | New record |
| 2011 | Font-rubí                    | Barcelona | Catalonia | New record |
| 2011 | La Pobla de Claramunt        | Barcelona | Catalonia | New record |
| 2011 | La Roca del Vallès           | Barcelona | Catalonia | New record |
| 2011 | Mediona                      | Barcelona | Catalonia | New record |
| 2011 | Navarcles                    | Barcelona | Catalonia | New record |
| 2011 | Rajadell                     | Barcelona | Catalonia | New record |
| 2011 | Sant Antoni de Vilamajor     | Barcelona | Catalonia | New record |
| 2011 | Sant Joan de Vilatorrada     | Barcelona | Catalonia | New record |
| 2011 | Sant Quintí de Mediona       | Barcelona | Catalonia | New record |
| 2011 | Santa Fe del Penedès         | Barcelona | Catalonia | New record |
| 2011 | Santa Margarida i els Monjos | Barcelona | Catalonia | New record |
| 2011 | Santa Maria de Palautordera  | Barcelona | Catalonia | New record |
| 2011 | Santpedor                    | Barcelona | Catalonia | New record |
| 2011 | Vallgorguina                 | Barcelona | Catalonia | New record |
| 2011 | Vilanova del Camí            | Barcelona | Catalonia | New record |
| 2011 | Albinyana                    | Tarragona | Catalonia | New record |
| 2011 | Banyeres del Penedès         | Tarragona | Catalonia | New record |
| 2011 | Bonastre                     | Tarragona | Catalonia | New record |

|      |                      |           |                     |            |
|------|----------------------|-----------|---------------------|------------|
| 2011 | Constantí            | Tarragona | Catalonia           | New record |
| 2011 | L'Arboç              | Tarragona | Catalonia           | New record |
| 2011 | La Bisbal de Penedès | Tarragona | Catalonia           | New record |
| 2011 | La Nou de Gaià       | Tarragona | Catalonia           | New record |
| 2011 | La Secuita           | Tarragona | Catalonia           | New record |
| 2011 | La Selva del Camp    | Tarragona | Catalonia           | New record |
| 2011 | Les Borges del Camp  | Tarragona | Catalonia           | New record |
| 2011 | Llorenç del Penedès  | Tarragona | Catalonia           | New record |
| 2011 | Maspujols            | Tarragona | Catalonia           | New record |
| 2011 | Mont-roig del Camp   | Tarragona | Catalonia           | New record |
| 2011 | Montbrió del Camp    | Tarragona | Catalonia           | New record |
| 2011 | Perafort             | Tarragona | Catalonia           | New record |
| 2011 | Riudoms              | Tarragona | Catalonia           | New record |
| 2011 | Santa Oliva          | Tarragona | Catalonia           | New record |
| 2011 | Valls                | Tarragona | Catalonia           | New record |
| 2011 | Vinyols i els Arcs   | Tarragona | Catalonia           | New record |
| 2011 | Orpesa               | Castellón | Valencian Community | [33]       |
| 2011 | Guardamar del Segura | Alicante  | Valencian Community | [33]       |
| 2011 | Pilar de la Horadada | Alicante  | Valencian Community | [33]       |
| 2011 | Murcia               | Murcia    | Region of Murcia    | [31]       |
| 2012 | Anglès               | Girona    | Catalonia           | New record |
| 2012 | Bescanó              | Girona    | Catalonia           | New record |
| 2012 | Breda                | Girona    | Catalonia           | New record |
| 2012 | Camós                | Girona    | Catalonia           | New record |
| 2012 | Darnius              | Girona    | Catalonia           | New record |
| 2012 | Olot                 | Girona    | Catalonia           | New record |
| 2012 | Porqueres            | Girona    | Catalonia           | New record |
| 2012 | Vilafant             | Girona    | Catalonia           | New record |
| 2012 | Avinyó               | Barcelona | Catalonia           | New record |
| 2012 | Callús               | Barcelona | Catalonia           | New record |
| 2012 | Carme                | Barcelona | Catalonia           | New record |
| 2012 | Figaró - Montmany    | Barcelona | Catalonia           | New record |
| 2012 | Gualba               | Barcelona | Catalonia           | New record |
| 2012 | Igualada             | Barcelona | Catalonia           | New record |
| 2012 | La Llacuna           | Barcelona | Catalonia           | New record |
| 2012 | Les Cabanyes         | Barcelona | Catalonia           | New record |
| 2012 | Llinars del Vallès   | Barcelona | Catalonia           | New record |
| 2012 | Olèrdola             | Barcelona | Catalonia           | New record |
| 2012 | Pacs del Penedès     | Barcelona | Catalonia           | New record |
| 2012 | Pontons              | Barcelona | Catalonia           | New record |
| 2012 | Puigdàlber           | Barcelona | Catalonia           | New record |
| 2012 | Sallent              | Barcelona | Catalonia           | New record |
| 2012 | Tagamanent           | Barcelona | Catalonia           | New record |
| 2012 | Torrelles de Foix    | Barcelona | Catalonia           | New record |
| 2012 | Vic                  | Barcelona | Catalonia           | New record |
| 2012 | Vilobí del Penedès   | Barcelona | Catalonia           | New record |
| 2012 | Alcover              | Tarragona | Catalonia           | New record |
| 2012 | Botarell             | Tarragona | Catalonia           | New record |

|      |                            |                  |                     |            |
|------|----------------------------|------------------|---------------------|------------|
| 2012 | Bràfim                     | Tarragona        | Catalonia           | New record |
| 2012 | El Montmell                | Tarragona        | Catalonia           | New record |
| 2012 | El Morell                  | Tarragona        | Catalonia           | New record |
| 2012 | Els Garidells              | Tarragona        | Catalonia           | New record |
| 2012 | L'Aleixar                  | Tarragona        | Catalonia           | New record |
| 2012 | La Canonja                 | Tarragona        | Catalonia           | New record |
| 2012 | La Pobla de Mafumet        | Tarragona        | Catalonia           | New record |
| 2012 | Masllorenç                 | Tarragona        | Catalonia           | New record |
| 2012 | Montferri                  | Tarragona        | Catalonia           | New record |
| 2012 | Nulles                     | Tarragona        | Catalonia           | New record |
| 2012 | Renau                      | Tarragona        | Catalonia           | New record |
| 2012 | Rodonyà                    | Tarragona        | Catalonia           | New record |
| 2012 | Salomó                     | Tarragona        | Catalonia           | New record |
| 2012 | Sant Jaume dels Domenys    | Tarragona        | Catalonia           | New record |
| 2012 | Vallmoll                   | Tarragona        | Catalonia           | New record |
| 2012 | Vespella de Gaià           | Tarragona        | Catalonia           | New record |
| 2012 | Vilallonga del Camp        | Tarragona        | Catalonia           | New record |
| 2012 | Vilanova d'Escornalbou     | Tarragona        | Catalonia           | New record |
| 2012 | Borriol                    | Castellón        | Valencian Community | [33]       |
| 2012 | Castelló de la Plana       | Castellón        | Valencian Community | [33]       |
| 2012 | La Pobla de Tornessa       | Castellón        | Valencian Community | [33]       |
| 2012 | Torreblanca                | Castellón        | Valencian Community | [33]       |
| 2012 | Vall d'Alba                | Castellón        | Valencian Community | [33]       |
| 2012 | Benijófar                  | Alicante         | Valencian Community | [33]       |
| 2012 | Elx                        | Alicante         | Valencian Community | [33]       |
| 2012 | Rojales                    | Alicante         | Valencian Community | [33]       |
| 2012 | Santa Pola                 | Alicante         | Valencian Community | [33]       |
| 2012 | Bunyola                    | Balearic/Majorca | Balearic Islands    | [32]       |
| 2012 | Calvià                     | Balearic/Majorca | Balearic Islands    | [32]       |
| 2012 | Esporles                   | Balearic/Majorca | Balearic Islands    | [32]       |
| 2012 | Marratxí                   | Balearic/Majorca | Balearic Islands    | [32]       |
| 2012 | Palma de Mallorca          | Balearic/Majorca | Balearic Islands    | [32]       |
| 2012 | Mazarrón                   | Murcia           | Region of Murcia    | [14]       |
| 2012 | San Pedro del Pinatar      | Murcia           | Region of Murcia    | [33]       |
| 2013 | Massanes                   | Girona           | Catalonia           | New record |
| 2013 | Balsareny                  | Barcelona        | Catalonia           | New record |
| 2013 | Campins                    | Barcelona        | Catalonia           | New record |
| 2013 | Castellfollit del Boix     | Barcelona        | Catalonia           | New record |
| 2013 | El Pla del Penedès         | Barcelona        | Catalonia           | New record |
| 2013 | Navàs                      | Barcelona        | Catalonia           | New record |
| 2013 | Sant Pere de Vilamajor     | Barcelona        | Catalonia           | New record |
| 2013 | Sant Quirze Safaja         | Barcelona        | Catalonia           | New record |
| 2013 | Santa Margarida de Montbui | Barcelona        | Catalonia           | New record |
| 2013 | Súria                      | Barcelona        | Catalonia           | New record |
| 2013 | Talamanca                  | Barcelona        | Catalonia           | New record |
| 2013 | Alió                       | Tarragona        | Catalonia           | New record |
| 2013 | Almóster                   | Tarragona        | Catalonia           | New record |
| 2013 | El Milà                    | Tarragona        | Catalonia           | New record |

|      |                                      |                  |                     |            |
|------|--------------------------------------|------------------|---------------------|------------|
| 2013 | El Rourell                           | Tarragona        | Catalonia           | New record |
| 2013 | La Masó                              | Tarragona        | Catalonia           | New record |
| 2013 | Montblanc                            | Tarragona        | Catalonia           | New record |
| 2013 | Pla de Santa Maria                   | Tarragona        | Catalonia           | New record |
| 2013 | Pratdip                              | Tarragona        | Catalonia           | New record |
| 2013 | Puigpelat                            | Tarragona        | Catalonia           | New record |
| 2013 | Vandellòs i l'Hospitalet de l'Infant | Tarragona        | Catalonia           | New record |
| 2013 | Vila-rodona                          | Tarragona        | Catalonia           | New record |
| 2013 | Alcalà de Xivert                     | Castellón        | Valencian Community | [29]       |
| 2013 | Almassora                            | Castellón        | Valencian Community | [29]       |
| 2013 | Benicarló                            | Castellón        | Valencian Community | [29]       |
| 2013 | Benlloch                             | Castellón        | Valencian Community | [29]       |
| 2013 | Borriana                             | Castellón        | Valencian Community | [29]       |
| 2013 | Cabanes                              | Castellón        | Valencian Community | [29]       |
| 2013 | L'Alcora                             | Castellón        | Valencian Community | [29]       |
| 2013 | La Serra d'en Galceran               | Castellón        | Valencian Community | [29]       |
| 2013 | Les Coves de Vinromà                 | Castellón        | Valencian Community | [29]       |
| 2013 | Peñíscola                            | Castellón        | Valencian Community | [29]       |
| 2013 | Sant Juan de Moró                    | Castellón        | Valencian Community | [29]       |
| 2013 | Vila-real                            | Castellón        | Valencian Community | [29]       |
| 2013 | Vilafamés                            | Castellón        | Valencian Community | [29]       |
| 2013 | Vilanova d'Alcolea                   | Castellón        | Valencian Community | [29]       |
| 2013 | Vinarós                              | Castellón        | Valencian Community | [29]       |
| 2013 | Cullera                              | Valencia         | Valencian Community | [29]       |
| 2013 | Gandia                               | Valencia         | Valencian Community | [29]       |
| 2013 | Real de Gandia                       | Valencia         | Valencian Community | [15]       |
| 2013 | Sueca                                | Valencia         | Valencian Community | [29]       |
| 2013 | Algorfa                              | Alicante         | Valencian Community | [29]       |
| 2013 | Alicante                             | Alicante         | Valencian Community | [29]       |
| 2013 | Benejúzar                            | Alicante         | Valencian Community | [29]       |
| 2013 | Daia Nova                            | Alicante         | Valencian Community | [29]       |
| 2013 | Daia Vella                           | Alicante         | Valencian Community | [29]       |
| 2013 | Dolores                              | Alicante         | Valencian Community | [29]       |
| 2013 | El Campello                          | Alicante         | Valencian Community | [17]       |
| 2013 | Formentera del Segura                | Alicante         | Valencian Community | [29]       |
| 2013 | Jacarilla                            | Alicante         | Valencian Community | [29]       |
| 2013 | Los Montesinos                       | Alicante         | Valencian Community | [29]       |
| 2013 | San Fulgencio                        | Alicante         | Valencian Community | [29]       |
| 2013 | Banyalbufar                          | Balearic/Majorca | Balearic Islands    | New record |
| 2013 | Santa Maria del Camí                 | Balearic/Majorca | Balearic Islands    | New record |
| 2013 | Águilas                              | Murcia           | Region of Murcia    | [29]       |
| 2013 | Cartagena                            | Murcia           | Region of Murcia    | [29]       |
| 2013 | San Javier                           | Murcia           | Region of Murcia    | [29]       |
| 2014 | Amer                                 | Girona           | Catalonia           | New record |
| 2014 | Besalú                               | Girona           | Catalonia           | New record |
| 2014 | Bordiils                             | Girona           | Catalonia           | New record |
| 2014 | Brunyola                             | Girona           | Catalonia           | New record |
| 2014 | Campllong                            | Girona           | Catalonia           | New record |

|      |                                           |           |           |            |
|------|-------------------------------------------|-----------|-----------|------------|
| 2014 | Canet d'Adri                              | Girona    | Catalonia | New record |
| 2014 | Cruïlles, Monells i St Sadurní de l'Heura | Girona    | Catalonia | New record |
| 2014 | Forallac                                  | Girona    | Catalonia | New record |
| 2014 | Juià                                      | Girona    | Catalonia | New record |
| 2014 | La Cellera de Ter                         | Girona    | Catalonia | New record |
| 2014 | Llambilles                                | Girona    | Catalonia | New record |
| 2014 | Mieres                                    | Girona    | Catalonia | New record |
| 2014 | Mont-ras                                  | Girona    | Catalonia | New record |
| 2014 | Quart                                     | Girona    | Catalonia | New record |
| 2014 | Sant Joan de Mollet                       | Girona    | Catalonia | New record |
| 2014 | Sant Julià de Llor i Bonmatí              | Girona    | Catalonia | New record |
| 2014 | Sant Martí Vell                           | Girona    | Catalonia | New record |
| 2014 | Vall-llobrega                             | Girona    | Catalonia | New record |
| 2014 | Aguilar de Segarra                        | Barcelona | Catalonia | New record |
| 2014 | Berga                                     | Barcelona | Catalonia | New record |
| 2014 | Calders                                   | Barcelona | Catalonia | New record |
| 2014 | Castellterçol                             | Barcelona | Catalonia | New record |
| 2014 | Castellví de la Marca                     | Barcelona | Catalonia | New record |
| 2014 | La Torre de Claramunt                     | Barcelona | Catalonia | New record |
| 2014 | Monistrol de Calders                      | Barcelona | Catalonia | New record |
| 2014 | Òdena                                     | Barcelona | Catalonia | New record |
| 2014 | Orpí                                      | Barcelona | Catalonia | New record |
| 2014 | Sant Esteve de Palautordera               | Barcelona | Catalonia | New record |
| 2014 | Sant Martí de Tous                        | Barcelona | Catalonia | New record |
| 2014 | Sant Martí Sarroca                        | Barcelona | Catalonia | New record |
| 2014 | Sant Pere Riudebitlles                    | Barcelona | Catalonia | New record |
| 2014 | Santa Maria d'Oló                         | Barcelona | Catalonia | New record |
| 2014 | Vilalba Sasserra                          | Barcelona | Catalonia | New record |
| 2014 | Aiguamúrcia                               | Tarragona | Catalonia | New record |
| 2014 | Alcanar                                   | Tarragona | Catalonia | New record |
| 2014 | Alforja                                   | Tarragona | Catalonia | New record |
| 2014 | Amposta                                   | Tarragona | Catalonia | New record |
| 2014 | Cabra del Camp                            | Tarragona | Catalonia | New record |
| 2014 | Camarles                                  | Tarragona | Catalonia | New record |
| 2014 | Deltebre                                  | Tarragona | Catalonia | New record |
| 2014 | Duesaigües                                | Tarragona | Catalonia | New record |
| 2014 | Figuerola del Camp                        | Tarragona | Catalonia | New record |
| 2014 | L'Aldea                                   | Tarragona | Catalonia | New record |
| 2014 | L'Ametlla de Mar                          | Tarragona | Catalonia | New record |
| 2014 | L'Ampolla                                 | Tarragona | Catalonia | New record |
| 2014 | L'Espluga de Fancolí                      | Tarragona | Catalonia | New record |
| 2014 | La Riba                                   | Tarragona | Catalonia | New record |
| 2014 | Riudecanyes                               | Tarragona | Catalonia | New record |
| 2014 | Riudecols                                 | Tarragona | Catalonia | New record |
| 2014 | Roquetes                                  | Tarragona | Catalonia | New record |
| 2014 | Sant Carles de la Ràpita                  | Tarragona | Catalonia | New record |
| 2014 | Sant Jaume d'Enveja                       | Tarragona | Catalonia | New record |

|      |                          |                  |                     |            |
|------|--------------------------|------------------|---------------------|------------|
| 2014 | Tivissa                  | Tarragona        | Catalonia           | New record |
| 2014 | Tortosa                  | Tarragona        | Catalonia           | New record |
| 2014 | Vilabella                | Tarragona        | Catalonia           | New record |
| 2014 | Vilaplana                | Tarragona        | Catalonia           | New record |
| 2014 | Vilaverd                 | Tarragona        | Catalonia           | New record |
| 2014 | Vimbodí i Poblet         | Tarragona        | Catalonia           | New record |
| 2014 | Nules                    | Castellón        | Valencian Community | New record |
| 2014 | Alzira                   | Valencia         | Valencian Community | New record |
| 2014 | Canet d'en Berenguer     | Valencia         | Valencian Community | New record |
| 2014 | Godella                  | Valencia         | Valencian Community | New record |
| 2014 | La Pobla de Farnals      | Valencia         | Valencian Community | New record |
| 2014 | Oliva                    | Valencia         | Valencian Community | New record |
| 2014 | Paiporta                 | Valencia         | Valencian Community | New record |
| 2014 | Picanya                  | Valencia         | Valencian Community | [16]       |
| 2014 | Sagunt                   | Valencia         | Valencian Community | New record |
| 2014 | Tavernes de la Valldigna | Valencia         | Valencian Community | New record |
| 2014 | València                 | Valencia         | Valencian Community | New record |
| 2014 | Altea                    | Alicante         | Valencian Community | New record |
| 2014 | Benidorm                 | Alicante         | Valencian Community | New record |
| 2014 | Calp                     | Alicante         | Valencian Community | New record |
| 2014 | Dènia                    | Alicante         | Valencian Community | [18]       |
| 2014 | Ondara                   | Alicante         | Valencian Community | New record |
| 2014 | Sant Joan d'Alacant      | Alicante         | Valencian Community | New record |
| 2014 | Teulada                  | Alicante         | Valencian Community | New record |
| 2014 | Villajoyosa              | Alicante         | Valencian Community | New record |
| 2014 | Xàbia                    | Alicante         | Valencian Community | New record |
| 2014 | Algaida                  | Balearic/Majorca | Balearic Islands    | New record |
| 2014 | Andratx                  | Balearic/Majorca | Balearic Islands    | New record |
| 2014 | Llucmajor                | Balearic/Majorca | Balearic Islands    | New record |
| 2014 | Puigpunyent              | Balearic/Majorca | Balearic Islands    | New record |
| 2014 | Santa Maria del Camí     | Balearic/Majorca | Balearic Islands    | New record |
| 2014 | Sant Antoni de Portmani  | Balearic/Ibiza   | Balearic Islands    | [34]       |
| 2014 | Alcantarilla             | Murcia           | Region of Murcia    | New record |
| 2014 | Alhama De Murcia         | Murcia           | Region of Murcia    | New record |
| 2014 | Beniel                   | Murcia           | Region of Murcia    | New record |
| 2014 | Fuente Álamo             | Murcia           | Region of Murcia    | New record |
| 2014 | Las Torres de Cotillas   | Murcia           | Region of Murcia    | New record |
| 2014 | Los Alcázares            | Murcia           | Region of Murcia    | New record |
| 2014 | Molina de Segura         | Murcia           | Region of Murcia    | New record |
| 2014 | Torre Pacheco            | Murcia           | Region of Murcia    | New record |
| 2014 | Garrucha                 | Almería          | Andalusia           | New record |
| 2014 | Pulpí                    | Almería          | Andalusia           | New record |
| 2014 | Gualchos                 | Granada          | Andalusia           | New record |
| 2014 | Polopos                  | Granada          | Andalusia           | New record |
| 2014 | Alhaurín de la Torre     | Málaga           | Andalusia           | [27]       |
| 2014 | Irún                     | Guipúzcoa        | Basque Country      | [25]       |
